# Supplementary material
Source: publisher site journal article supplement (https://www.dovepress.com/get_supplementary_file.php?f=455051.docx)
Supplement: Supplementary file 1 [file get_supplementary_file.php]

**Whole genome sequence analysis of two** **oxacillin-resistant and *mecA*-positive strains of *Staphylococcus haemolyticus* isolated from ear swabs samples of patients with otitis media**

**Table legends**

Table S1. Details of the IS*256-*element of *S. haemolyticus* SH9361 detected in different species.

Table S2. The plasmids similar to the plasmid pSH1275-3 of *S. haemolyticus* SH1275.

Table S3. The plasmids or chromosomal regions similar to the plasmid pSH9361-1 of *S. haemolyticus* SH9361

**Fgiure legend**

Figure S1. Comparison of the plasmid pSH9361-2 of *S. haemolyticus* strain SH9361 and the 9th plasmid of *S. aureus* strain ST2594 generated by Easyfig.

Table S1. Details of the IS*256-*element of *S. haemolyticus* SH9361 detected in different species.

| Accession | Coverage (%) | Identities (%) | Description |
| --- | --- | --- | --- |
| AP021848 | 100 | 100 | Staphylococcus lugdunensis JICS135 DNA |
| CP047822 | 100 | 100 | Staphylococcus aureus strain UP_1278 chromosome |
| LR735432 | 100 | 100 | Staphylococcus epidermidis strain none genome assembly, chromosome: 1 |
| LR735429 | 100 | 100 | Staphylococcus epidermidis strain none genome assembly, chromosome: 1 |
| LR735422 | 100 | 100 | Staphylococcus epidermidis strain none genome assembly, plasmid: 2 |
| LR735421 | 100 | 100 | Staphylococcus epidermidis strain none genome assembly, chromosome: 1 |
| CP036247 | 100 | 100 | Enterococcus faecalis R712 plasmid pR712_01 |
| CP040850 | 100 | 100 | Enterococcus faecium strain F17E0263 plasmid p_unnamned1 |
| AP019306 | 100 | 100 | Staphylococcus aureus TUM9463 DNA |
| AP019305 | 100 | 100 | Staphylococcus aureus TUM9458 DNA |
| MH587575 | 100 | 100 | Staphylococcus aureus strain WBG4880 plasmid pWBG637 |
| AP018587 | 100 | 100 | Staphylococcus caprae JMUB898 DNA |
| AP018585 | 100 | 100 | Staphylococcus caprae JMUB145 DNA |
| CP031839 | 100 | 100 | Staphylococcus aureus strain NX-T55 chromosome |
| CP031838 | 100 | 100 | Staphylococcus aureus strain QD-CD9 chromosome |
| LR027876 | 100 | 100 | Staphylococcus aureus strain JKD6009 genome assembly, chromosome: 1 |
| LR027872 | 100 | 100 | Staphylococcus aureus strain BPH2019 genome assembly, plasmid: 3 |
| LR027869 | 100 | 100 | Staphylococcus aureus isolate BPH2869 genome assembly, chromosome: 1 |
| CP030136 | 100 | 100 | Staphylococcus aureus strain S57 chromosome |
| CP034486 | 100 | 100 | Staphylococcus aureus strain PMB 64-1 chromosome |
| CP022905 | 100 | 100 | Staphylococcus aureus strain 628 chromosome |
| CP022908 | 100 | 100 | Staphylococcus aureus strain 545 chromosome |
| CP022906 | 100 | 100 | Staphylococcus aureus strain 546 chromosome |
| CP022904 | 100 | 100 | Staphylococcus aureus strain 629 chromosome |
| CP022903 | 100 | 100 | Staphylococcus aureus strain 187 chromosome |
| CP022902 | 100 | 100 | Staphylococcus aureus strain 165 chromosome |
| CP022894 | 100 | 100 | Staphylococcus aureus strain 191 chromosome |
| CP022893 | 100 | 100 | Staphylococcus aureus strain 61 chromosome |
| LT992471 | 100 | 100 | Staphylococcus aureus isolate 17_LA_343 genome assembly, chromosome: I |
| LT992467 | 100 | 100 | Staphylococcus aureus isolate 16_LA_309 genome assembly, chromosome: I |
| LS483319 | 100 | 100 | Staphylococcus aureus strain NCTC13140 genome assembly, chromosome: 1 |
| CP015447 | 100 | 100 | Staphylococcus aureus strain M92 chromosome |
| MF185208 | 100 | 100 | Staphylococcus aureus transposase IS431 (tnpIS256), bifunctional aminoglycoside N-acetyltransferase/aminoglycoside phosphotransferase (aacAaphD), hypothetical protein, and transposase IS256 (tnpIS256) genes, complete cds |
| MF547666 | 100 | 100 | Clostridioides difficile strain LIBA-6276 transposon Tn4001-like |
| CP025031 | 100 | 100 | Staphylococcus haemolyticus strain SGAir0252 chromosome |
| CP025396 | 100 | 100 | Staphylococcus haemolyticus strain 83131B chromosome |
| CP024809 | 100 | 100 | Staphylococcus haemolyticus strain 83131A chromosome |
| CP013943 | 100 | 100 | Staphylococcus epidermidis strain DAR1907 chromosome |
| CP025077 | 100 | 100 | Enterococcus faecium strain LS170308 chromosome |
| CP017115 | 100 | 100 | Staphylococcus aureus strain FORC_045 chromosome |
| CP020859 | 100 | 100 | Ligilactobacillus salivarius strain ZLS006 plasmid unnamed1 |
| CP019945 | 100 | 100 | Staphylococcus aureus strain BA01611 |
| LT571449 | 100 | 100 | Staphylococcus epidermidis isolate BPH0662 genome assembly, chromosome: 1 |
| CP129375 | 100 | 100 | Staphylococcus epidermidis strain CSMH-411EB plasmid pCSME411-1 |
| CP123983 | 100 | 100 | Staphylococcus haemolyticus strain SH9361 chromosome |
| CP121514 | 100 | 100 | Staphylococcus epidermidis strain 20DL plasmid unnamed1 |
| CP102571 | 100 | 100 | Staphylococcus haemolyticus strain 5 chromosome |
| CP120423 | 100 | 100 | Staphylococcus epidermidis strain 41DSE01 chromosome |
| CP120425 | 100 | 100 | Staphylococcus epidermidis strain 25DSE01 chromosome |
| CP119528 | 100 | 100 | Enterococcus faecalis strain 3143 chromosome |
| CP119571 | 100 | 100 | Staphylococcus aureus strain N08CSA36 chromosome |
| CP119189 | 100 | 100 | Clostridium perfringens strain 21-D-5 plasmid p21-D-5b |
| CP119341 | 100 | 100 | Staphylococcus aureus strain N29CSA02 chromosome |
| CP119340 | 100 | 100 | Staphylococcus aureus strain N28CSA05 chromosome |
| CP119338 | 100 | 100 | Staphylococcus aureus strain N09HSA11 chromosome |
| CP119159 | 100 | 100 | Enterococcus faecalis strain GENOMIC22-006 chromosome |
| LC757492 | 100 | 100 | Staphylococcus aureus T30 plasmid pW30A DNA |
| CP118266 | 100 | 100 | Clostridium perfringens strain QHY-2 plasmid pQHY-2 |
| CP116517 | 100 | 100 | Enterococcus faecium strain R39-1 chromosome |
| CP092476 | 100 | 100 | Staphylococcus haemolyticus strain CGMH-SH53 chromosome |
| AP026714 | 100 | 100 | Enterococcus faecalis SVR2085 DNA |
| LN866849 | 100 | 100 | Staphylococcus capitis CR01 complete genome |
| CP011116 | 100 | 100 | Staphylococcus haemolyticus strain Sh29/312/L2 |
| CP113016 | 100 | 100 | Staphylococcus aureus strain Azir chromosome |
| CP110360 | 100 | 100 | Enterococcus faecium strain AKSZ-142 chromosome |
| CP107527 | 100 | 100 | Staphylococcus aureus strain N17CSA11 chromosome |
| CP093212 | 100 | 100 | Staphylococcus epidermidis strain TSM-51 chromosome |
| CP093198 | 100 | 100 | Staphylococcus epidermidis strain TSM-18 chromosome |
| CP093196 | 100 | 100 | Staphylococcus epidermidis strain TMDU-2014-62 chromosome |
| CP093181 | 100 | 100 | Staphylococcus epidermidis strain TMDU-265 chromosome |
| CP093179 | 100 | 100 | Staphylococcus epidermidis strain TMDU-190 chromosome |
| CP097512 | 100 | 100 | Staphylococcus epidermidis strain C019 chromosome |
| CP051191 | 100 | 100 | Staphylococcus aureus strain NGA102 chromosome |
| CP094859 | 100 | 100 | Staphylococcus epidermidis strain C99 chromosome |
| CP093957 | 100 | 100 | Enterococcus faecalis strain NY13321 chromosome |
| CP091899 | 100 | 100 | Enterococcus faecalis strain 101-1 chromosome |
| CP090475 | 100 | 100 | Staphylococcus haemolyticus strain BC5211 chromosome |
| CP048008 | 100 | 100 | Staphylococcus lugdunensis strain CGMH-SL118 chromosome |
| CP077738 | 100 | 100 | Staphylococcus aureus strain UMCG578 chromosome |
| CP077741 | 100 | 100 | Staphylococcus aureus strain NL1 chromosome |
| CP082789 | 100 | 100 | Staphylococcus aureus strain HL24830 chromosome |
| CP080566 | 100 | 100 | Staphylococcus aureus isolate HL20835 chromosome |
| CP077757 | 100 | 100 | Staphylococcus aureus strain WHC07 chromosome |
| CP075604 | 100 | 100 | Enterococcus faecalis strain 1207/14 chromosome |
| CP073012 | 100 | 100 | Staphylococcus aureus strain SA14+ chromosome |
| AP024511 | 100 | 100 | Staphylococcus aureus 2007-13 DNA |
| CP052971 | 100 | 100 | Staphylococcus epidermidis strain HD33-1 chromosome |
| CP052990 | 100 | 100 | Staphylococcus epidermidis strain HD12-1 chromosome |
| CP052969 | 100 | 100 | Staphylococcus epidermidis strain HD33-3 chromosome |
| CP052962 | 100 | 100 | Staphylococcus epidermidis strain HD43-1 chromosome |
| CP052953 | 100 | 100 | Staphylococcus epidermidis strain HD66-1 chromosome |
| CP052951 | 100 | 100 | Staphylococcus epidermidis strain HD66-6 chromosome |
| LR962789 | 100 | 100 | Enterococcus faecalis isolate 27688_1#210 genome assembly, plasmid: 2 |
| LR962526 | 100 | 100 | Enterococcus faecalis isolate 28157_4#381 genome assembly, chromosome: 1 |
| LR962502 | 100 | 100 | Enterococcus faecalis isolate 28099_2#54 genome assembly, chromosome: 1 |
| LR962496 | 100 | 100 | Enterococcus faecalis isolate 28157_4#145 genome assembly, plasmid: 2 |
| LR962492 | 100 | 100 | Enterococcus faecalis isolate 28157_4#18 genome assembly, plasmid: 4 |
| LR962483 | 100 | 100 | Enterococcus faecalis isolate 28157_4#348 genome assembly, plasmid: 4 |
| LR962449 | 100 | 100 | Enterococcus faecalis isolate 28157_4#137 genome assembly, plasmid: 3 |
| LR962401 | 100 | 100 | Enterococcus faecalis isolate 28157_4#152 genome assembly, plasmid: 2 |
| LR962388 | 100 | 100 | Enterococcus faecalis isolate 28157_4#65 genome assembly, plasmid: 3 |
| LR962378 | 100 | 100 | Enterococcus faecalis isolate 28157_4#70 genome assembly, chromosome: 1 |
| LR962369 | 100 | 100 | Enterococcus faecalis isolate 28157_4#86 genome assembly, plasmid: 3 |
| LR962358 | 100 | 100 | Enterococcus faecalis isolate 28157_4#90 genome assembly, plasmid: 3 |
| LR962282 | 100 | 100 | Enterococcus faecalis isolate 27688_1#106 genome assembly, plasmid: 3 |
| LR962271 | 100 | 100 | Enterococcus faecalis isolate 27688_1#234 genome assembly, chromosome: 1 |
| LR962267 | 100 | 100 | Enterococcus faecalis isolate 27725_1#12 genome assembly, chromosome: 1 |
| LR962248 | 100 | 100 | Enterococcus faecalis isolate 27688_1#266 genome assembly, chromosome: 1 |
| LR962233 | 100 | 100 | Enterococcus faecalis isolate 27688_1#153 genome assembly, plasmid: 3 |
| LR962227 | 100 | 100 | Enterococcus faecalis isolate 27725_1#262 genome assembly, chromosome: 1 |
| LR962213 | 100 | 100 | Enterococcus faecalis isolate 27688_1#45 genome assembly, chromosome: 1 |
| LR962203 | 100 | 100 | Enterococcus faecalis isolate 27725_1#254 genome assembly, chromosome: 1 |
| LR962174 | 100 | 100 | Enterococcus faecalis isolate 27688_1#347 genome assembly, chromosome: 1 |
| LR962056 | 100 | 100 | Enterococcus faecalis isolate 26975_2#200 genome assembly, chromosome: 1 |
| LR962054 | 100 | 100 | Enterococcus faecalis isolate 26975_2#184 genome assembly, plasmid: 2 |
| LR962026 | 100 | 100 | Enterococcus faecalis isolate 26975_1#146 genome assembly, plasmid: 2 |
| LR962007 | 100 | 100 | Enterococcus faecalis isolate 26975_1#89 genome assembly, plasmid: 4 |
| LR961935 | 100 | 100 | Enterococcus faecalis isolate 26975_2#145 genome assembly, chromosome: 1 |
| CP065797 | 100 | 100 | Staphylococcus saprophyticus strain GDY8P168P chromosome |
| CP002120 | 100 | 100 | Staphylococcus aureus subsp. aureus str. JKD6008 |
| GU565967 | 100 | 100 | Staphylococcus aureus plasmid pSK1 |
| GQ900491 | 100 | 100 | Staphylococcus aureus plasmid pSK23, partial sequence |
| GQ900383 | 100 | 100 | Staphylococcus sp. CDC25 plasmid SAP018A |
| GQ900382 | 100 | 100 | Staphylococcus aureus plasmid SAP017A |
| AB246921 | 100 | 100 | Staphylococcus aureus mRNA for hypothetical proteins, putative glycosyltransferase, putative sugar transferase, putative epimerase, putative transposase, putative acetyltransferase, aminoglycoside modifying enzyme, putative transposase, putative transporter, partial and complete cds |
| AP006716 | 100 | 100 | Staphylococcus haemolyticus JCSC1435 DNA |
| CP000029 | 100 | 100 | Staphylococcus epidermidis RP62A |
| AE016833 | 100 | 100 | Enterococcus faecalis V583 plasmid pTEF1 |
| AB049452 | 100 | 100 | Staphylococcus epidermidis DNA, composite transposon |
| CP092538 | 100 | 100 | Staphylococcus aureus strain VMRSA-WC123 chromosome |
| CP092542 | 100 | 100 | Staphylococcus aureus strain VRMSSA-WC113 chromosome |
| CP092545 | 100 | 100 | Staphylococcus aureus strain VMRSA-WC102 plasmid unnamed1 |
| CP092550 | 100 | 100 | Staphylococcus aureus strain VMRSA-WC082 chromosome |
| GQ900487 | 100 | 100 | Enterococcus faecium plasmid p5753cB, partial sequence |
| CP030403 | 100 | 100 | Staphylococcus aureus strain ER03868.3 chromosome |
| CP121204 | 100 | 100 | Staphylococcus aureus strain SA0907 chromosome |
| CP053477 | 100 | 100 | Staphylococcus warneri strain WB224 chromosome |
| CP031029 | 100 | 100 | Enterococcus faecalis strain TY1 plasmid pDEF-2 |
| CP019513 | 100 | 100 | Enterococcus faecalis strain CLB21560 plasmid pA |
| LR962659 | 100 | 100 | Enterococcus faecalis isolate 26975_1#204 genome assembly, plasmid: 2 |
| LR962104 | 100 | 100 | Enterococcus faecalis isolate 26975_1#246 genome assembly, plasmid: 2 |
| LR962041 | 100 | 100 | Enterococcus faecalis isolate 26975_1#366 genome assembly, plasmid: 3 |
| LR962031 | 100 | 100 | Enterococcus faecalis isolate 26975_2#195 genome assembly, plasmid: 2 |
| LR962674 | 100 | 100 | Enterococcus faecalis isolate 26975_1#150 genome assembly, plasmid: 4 |
| CP063065 | 100 | 100 | Aerococcus urinaeequi strain T43 chromosome |
| GQ900514 | 100 | 100 | Staphylococcus aureus plasmid pSK17 partial sequence |
| LR961997 | 100 | 100 | Enterococcus faecalis isolate 26975_1#107 genome assembly, chromosome: 1 |
| CP081833 | 100 | 100 | Vagococcus lutrae strain BN31 chromosome |
| CP052974 | 100 | 100 | Staphylococcus epidermidis strain HD29-1 plasmid pHD29-1_1 |
| CP034113 | 100 | 100 | Staphylococcus epidermidis strain CDC120 plasmid pSTA492 |
| GQ900462 | 100 | 100 | Staphylococcus epidermidis plasmid pSK105 |
| LR962824 | 100 | 100 | Enterococcus faecalis isolate 28157_4#78 genome assembly, plasmid: 4 |
| LR962079 | 100 | 100 | Enterococcus faecalis isolate 26975_1#188 genome assembly, plasmid: 2 |
| CP039160 | 100 | 100 | Staphylococcus aureus strain Lr6 chromosome |
| CP040864 | 100 | 100 | Staphylococcus epidermidis strain HD33 chromosome |
| CP040867 | 100 | 100 | Staphylococcus epidermidis strain HD43 chromosome |
| MT074686 | 100 | 100 | Enterococcus faecium strain E1077 plasmid pE1077-217 |
| CP039162 | 100 | 100 | Staphylococcus aureus strain Lr12 chromosome |
| CP118550 | 100 | 100 | Enterococcus faecium strain W6 plasmid pW6-1 |
| AP027295 | 100 | 100 | Enterococcus faecium K6D plasmid K6D_p1 DNA |
| CP116544 | 100 | 100 | Enterococcus faecium strain K70-1a plasmid pK70-1a-A |
| CP109841 | 100 | 100 | Enterococcus faecium strain T17-1 plasmid pT17-1-1 |
| CP088192 | 100 | 100 | Enterococcus faecium strain S2-6b plasmid pS2-6b-a |
| CP091222 | 100 | 100 | Enterococcus faecium strain 642 plasmid p642-a |
| CP096052 | 100 | 100 | Enterococcus faecium strain AKSZ-142 plasmid pW142 |

Table S2. The plasmids similar to the plasmid pSH1275-3 of *S. haemolyticus* SH1275.

| Accession | Coverage (%) | Identities (%) | Lenth  (bp) | Description |
| --- | --- | --- | --- | --- |
| CP123982 | 100% | 100 | 6056 | *Staphylococcus haemolyticus* strain SH1275 plasmid pSH1275-3 |
| KX712120 | 100% | 100 | 6056 | *Staphylococcus haemolyticus* isolate 131A plasmid p131A |
| CP054009 | 100% | 100 | 6056 | *Staphylococcus hominis* strain FDAARGOS_762 plasmid unnamed4 |
| JQ861960 | 98% | 99.87 | 7567 | *Staphylococcus aureus* strain C4128 plasmid pUR4128 |
| JQ312422 | 99% | 99.71 | 7609 | *Staphylococcus aureus* strain C2355 plasmid pUR2355 |
| CP093542 | 100% | 99.9 | 6056 | *Staphylococcus hominis* strain C5 plasmid unnamed3 |

Table S3. The plasmids or chromosomal fragments similar to the plasmid pSH9361-1 of *S. haemolyticus* SH9361

| Accession | Coverage (%) | Identities (%) | Description |
| --- | --- | --- | --- |
| CP123984 | 100 | 100 | Staphylococcus haemolyticus strain SH9361 plasmid pSH9361-1 |
| CP127756 | 99 | 99.8 | Staphylococcus aureus strain C222 plasmid pC222_1 |
| GQ900393 | 100 | 99.88 | Staphylococcus aureus plasmid pWBG751 |
| CP014405 | 100 | 99.96 | Staphylococcus aureus strain USA300-SUR11 plasmid pUSA05-1-SUR11 |
| CP014400 | 100 | 99.96 | Staphylococcus aureus strain USA300-SUR10 plasmid pUSA05-1-SUR10 |
| CP014395 | 100 | 99.96 | Staphylococcus aureus strain USA300-SUR9 plasmid pUSA05-1-SUR9 |
| CP014390 | 100 | 99.96 | Staphylococcus aureus strain USA300-SUR8 plasmid pUSA05-1-SUR8 |
| CP014374 | 100 | 99.96 | Staphylococcus aureus strain USA300-SUR4 plasmid pUSA05-1-SUR4 |
| CP014379 | 100 | 99.96 | Staphylococcus aureus strain USA300-SUR5 plasmid pUSA05-1-SUR5 |
| CP094878 | 100 | 99.96 | Staphylococcus epidermidis strain C101 plasmid pC101MK6 |
| CP070988 | 100 | 99.87 | Staphylococcus aureus strain WBG8287 plasmid pWBG751 |
| CP129368 | 100 | 99.79 | Staphylococcus epidermidis strain CKFA-393 plasmid pCKFA393-3 |
| LR130514 | 100 | 99.79 | Staphylococcus aureus strain BPH2900 genome assembly, plasmid: 2 |
| LR735438 | 100 | 99.09 | Staphylococcus epidermidis strain none genome assembly, plasmid: 2 |
| CP049429 | 100 | 99.09 | Staphylococcus aureus strain pt259 chromosome |
| CP094871 | 100 | 99.33 | Staphylococcus epidermidis strain C100 plasmid pC100MK6 |
| CP029165 | 100 | 99.05 | Staphylococcus aureus strain SVH7513 plasmid pSVH7513b |
| MN216340 | 100 | 99.33 | Staphylococcus aureus strain SR42 plasmid pSR42 |
| CP127529 | 100 | 99.79 | Staphylococcus aureus strain C347 plasmid pC347_1 |
| CP127732 | 100 | 99.79 | Staphylococcus aureus strain C24 plasmid pC24_1 |
| CP127531 | 100 | 99.79 | Staphylococcus aureus strain C272 plasmid pC272_1 |
| CP041633 | 100 | 99.7 | Staphylococcus aureus strain 18082 chromosome |
| CP098730 | 100 | 99.78 | Staphylococcus aureus strain SauR3 plasmid pSauR3-3 |
| CP045476 | 100 | 99.87 | Staphylococcus aureus strain 515798 plasmid p515718b |
| CP047832 | 100 | 99.64 | Staphylococcus aureus strain UP_996 plasmid unnamed2 |
| MH423311 | 100 | 99.69 | Staphylococcus aureus strain Sau-2716Lar plasmid pSau-2716Lar |
| CP084446 | 100 | 99.25 | Staphylococcus lugdunensis strain RMLUG6 plasmid pRMLUG6_2 |
| CP127589 | 100 | 99.77 | Staphylococcus aureus strain C868 plasmid pC868_1 |
| MN251855 | 100 | 99.77 | Staphylococcus aureus subsp. aureus strain SR100 plasmid pSR100 |
| CP058616 | 100 | 99.95 | Staphylococcus aureus strain 110900 plasmid unnamed |
| CP051951 | 100 | 99.13 | Staphylococcus aureus strain ER09971.3 plasmid pER09971.3A.2 |
| CP002148 | 100 | 99.76 | Staphylococcus aureus strain 19321 plasmid p19321-P01 |
| DQ088624 | 100 | 99.76 | Staphylococcus aureus strain CMRSA plasmid pWBG738 |
| CP058614 | 100 | 99.95 | Staphylococcus aureus strain 128254 plasmid unnamed |
| LC086373 | 100 | 99.75 | Staphylococcus aureus plasmid pWKT1 DNA |
| M17990 | 100 | 99.7 | Staphylococcus aureus, strain RN451 plasmid pE5 |
| CP115888 | 100 | 99.75 | Staphylococcus aureus strain C308 plasmid pC308_1 |
| CP047816 | 100 | 99.95 | Staphylococcus aureus strain UP_1484 plasmid unnamed |
| M19652 | 100 | 99.26 | Staphylococcus aureus strain T48 plasmid pT48 |
| CP010404 | 100 | 99.5 | Staphylococcus aureus subsp. aureus strain GR2 plasmid pGR2B |
| AB982226 | 100 | 99.35 | Staphylococcus aureus strain: OC160 plasmid |
| CP068138 | 100 | 99.95 | Staphylococcus epidermidis strain FDAARGOS_1083 plasmid unnamed2 |
| CP084483 | 100 | 99.09 | Staphylococcus lugdunensis strain RMLUG1 plasmid pRMLUG1_3 |
| CP030487 | 100 | 99.09 | Staphylococcus aureus strain ER03913.3 plasmid unnamed5 |
| CP127535 | 100 | 99.72 | Staphylococcus aureus strain C344 plasmid pC344_1 |
| CP121206 | 100 | 99.27 | Staphylococcus aureus strain SA0907 plasmid pSA0907-2 |
| CP035541 | 100 | 99.94 | Staphylococcus haemolyticus strain PK-01 chromosome |
| CP127533 | 100 | 99.7 | Staphylococcus aureus strain C247 plasmid pC247_1 |
| AJ888003 | 100 | 99.33 | Staphylococcus pSTE2 plasmid (Mammaliicoccus lentus) |
| MH423313 | 100 | 99.75 | Staphylococcus hominis strain Sho-115Lar plasmid pSho-115Lar |
| KF831357 | 100 | 99.56 | Staphylococcus aureus strain A960649 plasmid pBU108c |
| CP027424 | 100 | 99.74 | Staphylococcus cohnii strain FDAARGOS_334 plasmid unnamed5 |
| CP019565 | 100 | 99.47 | Staphylococcus aureus strain SR434 plasmid pSR02 |
| CP093178 | 100 | 99.71 | Staphylococcus epidermidis strain TMDU-137 plasmid p5 |
| CP047825 | 100 | 99.93 | Staphylococcus aureus strain UP_1278 plasmid unnamed3 |
| CP083730 | 100 | 99.93 | Staphylococcus aureus strain MR254 plasmid pMR254-2 |
| CP062317 | 100 | 99.42 | Staphylococcus aureus strain NAS_OP_133 plasmid unnamed3 |
| CP047819 | 100 | 99.56 | Staphylococcus aureus strain UP_1433 plasmid unnamed2 |
| CP003981 | 100 | 99.63 | Staphylococcus aureus subsp. aureus CN1 plasmid |
| CP054554 | 100 | 99.7 | Staphylococcus hominis strain FDAARGOS_661 plasmid unnamed5 |
| CP029648 | 100 | 99.7 | Staphylococcus aureus strain AR_0472 plasmid unnamed1 |
| CP084439 | 100 | 99.7 | Staphylococcus lugdunensis strain RMLUG3 plasmid pRMLUG3_2 |
| U82607 | 100 | 99.03 | Staphylococcus chromogenes plasmid pPV141 |
| CP047322 | 100 | 99.92 | Staphylococcus aureus strain RJ1267 plasmid unnamed |
| CP083261 | 99 | 99.68 | Staphylococcus aureus strain HL25274 plasmid pHL25274_2 |
| CP091524 | 100 | 100 | Staphylococcus aureus strain N12HSA28 plasmid unnamed1 |
| CP014446 | 100 | 99.52 | Staphylococcus aureus strain USA300-SUR24 plasmid pUSA05-1-SUR24 |
| CP014417 | 100 | 99.52 | Staphylococcus aureus strain USA300-SUR15 plasmid pUSA05-1-SUR15 |
| CP097518 | 100 | 99.92 | Staphylococcus epidermidis strain C034 plasmid pC034MK4 |
| CP097523 | 100 | 99.92 | Staphylococcus epidermidis strain C066 plasmid pC066MK4 |


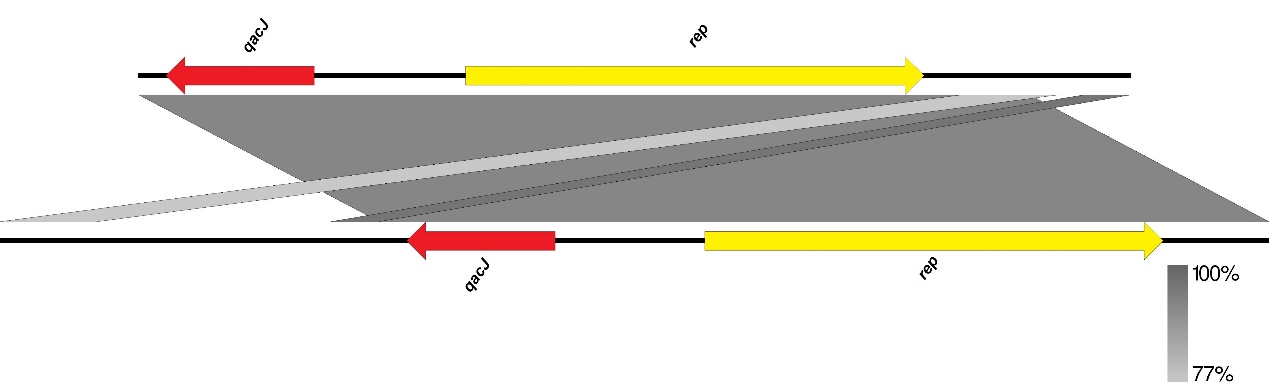


Figure S1
